# The Gravity of Weight

## A Clinical Guide to Weight Loss and Maintenance

Sylvia R. Karasu, M.D., and T. Byram Karasu, M.D.

Foreword by Albert J. Stunkard, M.D.

**T**he *Gravity of Weight: A Clinical Guide to Weight Loss and Maintenance*, is a scholarly and critical inquiry into the field of overweight and obesity. Reviewing more than 900 publications, from some of the early classical papers to the most recent research, the authors have integrated the complex psychological and physiological aspects of the mind, brain, and body to explain why the control of body weight is so daunting for so many people.

Written primarily for clinicians in all health-related fields, including physicians, psychologists, nurses, social workers, and nutritionists, as well as for their intellectually curious patients,

*The Gravity of Weight* explores the controversy regarding obesity as a disease with morbidity and mortality, as well as the complex methodological issues involved in obesity research. The authors delineate the extraordinary metabolic complexities implicated in weight control as well as the importance of circadian rhythms and sleep as they relate to weight and even disorders such as the night eating syndrome. They also investigate the psychological aspects of overweight and obesity, including discrimination against the obese and the fat acceptance movement, and they discuss some of the most common diets as well as the psychotherapeutic, pharmacological, and surgical treatment options currently available for these patients.

Drs. Karasu have drawn from both professional and personal experience to write *The Gravity of Weight: A Clinical Guide To Weight Loss and Maintenance*. Both had fathers who suffered from morbid obesity. One died at the age of 56, while the other lived to be 91. The authors' professional curiosity led them to question how differences in environment, genetics, and overall physical and psychological health can affect one person's longevity and another's early passing.

In searching for the answers to some of the most perplexing questions regarding weight, the authors have created what is perhaps the most comprehensive exploration of the relationship of the mind, brain, body and our environment to overweight and obesity. The resulting text deserves a prominent place in the library of those who work in this field.

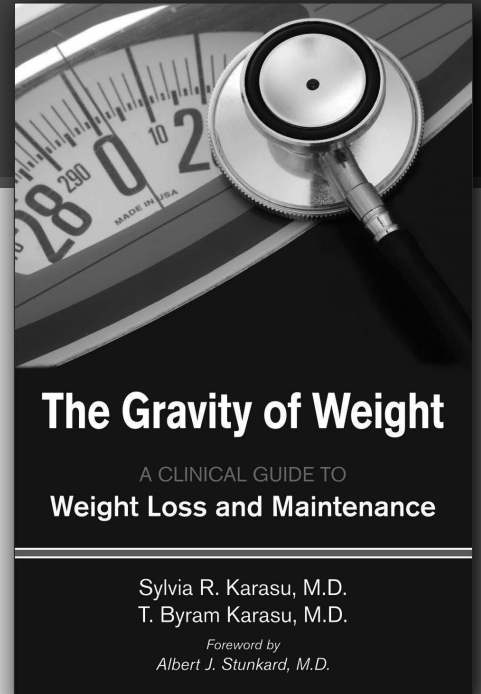

2010 • 518 pages • ISBN 978-1-58562-360-0 • Paperback • \$66.00 • Item #62360

AMERICAN  
PSYCHIATRIC  
ASSOCIATION  
PUBLISHING

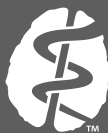

20% Discount for American Psychiatric Association Members!

25% Discount for APA Resident-Fellow Members

**PS Form 3526 Statement of Ownership, Management, and Circulation (All Periodicals Publications Except Requester Publications)**

|                                                                                                                                                                                                                                                                                                                                                                                                                                                                                                                                                                         |                                                       |                                           |                                                               |
|-------------------------------------------------------------------------------------------------------------------------------------------------------------------------------------------------------------------------------------------------------------------------------------------------------------------------------------------------------------------------------------------------------------------------------------------------------------------------------------------------------------------------------------------------------------------------|-------------------------------------------------------|-------------------------------------------|---------------------------------------------------------------|
| 1. Publication Title<br>AMERICAN PSYCHIATRIC ASSOCIATI/<br>AMERICAN PSYCHIATRIC ASSOCIATION                                                                                                                                                                                                                                                                                                                                                                                                                                                                             | 2. Publication Number<br>21577                        | ISSN<br>15414094                          | 3. Filing Date<br>09/29/2015                                  |
| 4. Issue Frequency<br>QUARTERLY                                                                                                                                                                                                                                                                                                                                                                                                                                                                                                                                         | 5. Number of Issues Published Annually<br>4           | 6. Annual Subscription Price<br>\$ 379.00 |                                                               |
| 7. Complete Mailing Address of Known Office of Publication<br>1000 WILSON BLVD STE 1825<br>ARLINGTON, ARLINGTON, VA 22209-3924                                                                                                                                                                                                                                                                                                                                                                                                                                          |                                                       |                                           | Contact Person<br>ROGER DOMRAS<br>Telephone<br>(703) 907-8544 |
| 8. Complete Mailing Address of Headquarters or General Business Office of Publisher<br>1000 Wilson Blvd., Ste. 1825<br>Arlington, VA 22209-3924                                                                                                                                                                                                                                                                                                                                                                                                                         |                                                       |                                           |                                                               |
| 9. Full Names and Complete Mailing Addresses of Publisher, Editor, and Managing Editor                                                                                                                                                                                                                                                                                                                                                                                                                                                                                  |                                                       |                                           |                                                               |
| Publisher (Name and complete mailing address)<br>Rebecca Rinehart<br>1000 Wilson Blvd., Ste. 1825<br>Arlington, VA 22209-3924                                                                                                                                                                                                                                                                                                                                                                                                                                           |                                                       |                                           |                                                               |
| Editor (Name and complete mailing address)<br>Mark Hyman Rappaport, M.D.<br>1000 Wilson Blvd., Ste. 1825<br>Arlington, VA 22209-3924                                                                                                                                                                                                                                                                                                                                                                                                                                    |                                                       |                                           |                                                               |
| Managing Editor (Name and complete mailing address)<br>Michael Roy<br>1000 Wilson Blvd., Ste. 1825<br>Arlington, VA 22209-3924                                                                                                                                                                                                                                                                                                                                                                                                                                          |                                                       |                                           |                                                               |
| 10. Owner (Do not leave blank. If the publication is owned by a corporation, give the name and address of the corporation immediately followed by the names and addresses of all stockholders owning or holding 1 percent or more of the total amount of stock. If not owned by a corporation, give names and addresses of the individual owners. If owned by a partnership or other unincorporated firm, give its name and address as well as those of each individual owner. If the publication is published by a nonprofit organization, give its name and address.) |                                                       |                                           |                                                               |
| Full Name                                                                                                                                                                                                                                                                                                                                                                                                                                                                                                                                                               | Complete Mailing Address                              |                                           |                                                               |
| American Psychiatric Assoc.                                                                                                                                                                                                                                                                                                                                                                                                                                                                                                                                             | 1000 Wilson Blvd., Ste 1825, Arlington, VA 22209-3924 |                                           |                                                               |
|                                                                                                                                                                                                                                                                                                                                                                                                                                                                                                                                                                         |                                                       |                                           |                                                               |
|                                                                                                                                                                                                                                                                                                                                                                                                                                                                                                                                                                         |                                                       |                                           |                                                               |
| 11. Known Bondholders, Mortgagees, and Other Security Holders Owning or Holding 1 Percent or More of Total Amount of Bonds, Mortgages, or Other Securities. If none, check box <input checked="" type="checkbox"/> None                                                                                                                                                                                                                                                                                                                                                 |                                                       |                                           |                                                               |
| Full Name                                                                                                                                                                                                                                                                                                                                                                                                                                                                                                                                                               | Complete Mailing Address                              |                                           |                                                               |
|                                                                                                                                                                                                                                                                                                                                                                                                                                                                                                                                                                         |                                                       |                                           |                                                               |
|                                                                                                                                                                                                                                                                                                                                                                                                                                                                                                                                                                         |                                                       |                                           |                                                               |

PS Form 3526, September 2007 (Page 1)

PRIVACY NOTICE: See our privacy policy on www.usps.com

|                                                                                                                                                                                                                                                                                                                                                        |                                                                                                                                                                    |                                                          |                                                             |
|--------------------------------------------------------------------------------------------------------------------------------------------------------------------------------------------------------------------------------------------------------------------------------------------------------------------------------------------------------|--------------------------------------------------------------------------------------------------------------------------------------------------------------------|----------------------------------------------------------|-------------------------------------------------------------|
| 13. Publication Title<br>AMERICAN PSYCHIATRIC ASSOCIATI/AMERICAN PSYCHIATRIC ASSOCIATION                                                                                                                                                                                                                                                               |                                                                                                                                                                    | 14. Issue Date for Circulation Data Below<br>07/01/2015  |                                                             |
| 15. Extend and Nature of Circulation                                                                                                                                                                                                                                                                                                                   |                                                                                                                                                                    | Average No. Copies Each Issue During Preceding 12 Months | No. Copies of Single Issue Published Nearest to Filing Date |
| a. Total Numbers of Copies (Net press run)                                                                                                                                                                                                                                                                                                             |                                                                                                                                                                    | 3720                                                     | 2850                                                        |
| b. Paid Circulation (By Mail and Outside the Mail)                                                                                                                                                                                                                                                                                                     | (1) Mailed Outside County Paid Subscriptions Stated on PS Form 3541 (include paid distribution above nominal rate, advertiser's proof copies, and exchange copies) | 2104                                                     | 1864                                                        |
|                                                                                                                                                                                                                                                                                                                                                        | (2) Mailed In-County Paid Subscriptions Stated on PS Form 3541 (include paid distribution above nominal rate, advertiser's proof copies, and exchange copies)      | 0                                                        | 0                                                           |
|                                                                                                                                                                                                                                                                                                                                                        | (3) Paid Distribution Outside the Mails Including Sales Through Dealers and Carriers, Street Vendors, Counter Sales, and Other Paid Distribution Outside USPS      | 84                                                       | 72                                                          |
|                                                                                                                                                                                                                                                                                                                                                        | (4) Paid Distribution by Other Classes of Mail Through the USPS (e.g. First-Class Mail)                                                                            | 0                                                        | 0                                                           |
| c. Total Paid Distribution (Sum of 15b (1), (2), (3), (4))                                                                                                                                                                                                                                                                                             |                                                                                                                                                                    | 2188                                                     | 1936                                                        |
| d. Free or Nominal Rate Distribution (By Mail and Outside the Mail)                                                                                                                                                                                                                                                                                    | (1) Free or Nominal Rate Outside County Copies included on PS Form 3541                                                                                            | 0                                                        | 0                                                           |
|                                                                                                                                                                                                                                                                                                                                                        | (2) Free or Nominal Rate In-County Copies included on PS Form 3541                                                                                                 | 0                                                        | 0                                                           |
|                                                                                                                                                                                                                                                                                                                                                        | (3) Free or Nominal Rate Copies Mailed at Other Classes Through the USPS (e.g. First-Class Mail)                                                                   | 0                                                        | 0                                                           |
|                                                                                                                                                                                                                                                                                                                                                        | (4) Free or Nominal Rate Distribution Outside the Mail (Carriers or other means)                                                                                   | 208                                                      | 158                                                         |
| e. Total Free or Nominal Rate Distribution (Sum of 15d (1), (2), (3), (4))                                                                                                                                                                                                                                                                             |                                                                                                                                                                    | 208                                                      | 158                                                         |
| f. Total Distribution (Sum of 15c and 15e)                                                                                                                                                                                                                                                                                                             |                                                                                                                                                                    | 2396                                                     | 2094                                                        |
| g. Copies not Distributed                                                                                                                                                                                                                                                                                                                              |                                                                                                                                                                    | 1324                                                     | 414                                                         |
| h. Total (Sum of 15f and 15g)                                                                                                                                                                                                                                                                                                                          |                                                                                                                                                                    | 3720                                                     | 2508                                                        |
| i. Percent Paid ((15c / 15f) times 100)                                                                                                                                                                                                                                                                                                                |                                                                                                                                                                    | 91.32 %                                                  | 92.45 %                                                     |
| 16. If total circulation includes electronic copies, report that circulation on lines below.                                                                                                                                                                                                                                                           |                                                                                                                                                                    |                                                          |                                                             |
| a. Paid Electronic Copies                                                                                                                                                                                                                                                                                                                              |                                                                                                                                                                    | 0                                                        | 0                                                           |
| b. Total Paid Print Copies (Line 15c) + Paid Electronic Copies                                                                                                                                                                                                                                                                                         |                                                                                                                                                                    | 0                                                        | 0                                                           |
| c. Total Print Distribution (Line 15f) + Paid Electronic Copies                                                                                                                                                                                                                                                                                        |                                                                                                                                                                    | 0                                                        | 0                                                           |
| d. Percent Paid (Both Print and Electronic Copies)                                                                                                                                                                                                                                                                                                     |                                                                                                                                                                    | 0.00 %                                                   | 0.00 %                                                      |
| <input type="checkbox"/> I certify that 50% of all my distributed copies (Electronic and Print) are paid above a nominal price.                                                                                                                                                                                                                        |                                                                                                                                                                    |                                                          |                                                             |
| 17. Publication of Statement of Ownership                                                                                                                                                                                                                                                                                                              |                                                                                                                                                                    |                                                          |                                                             |
| <input checked="" type="checkbox"/> If the publication is a general publication, publication of this statement is required. Will be printed in the 10/01/2015 issue of this publication. <input type="checkbox"/> Publication not required.                                                                                                            |                                                                                                                                                                    |                                                          |                                                             |
| 18. Signature and Title of Editor, Publisher, Business Manager, or Owner                                                                                                                                                                                                                                                                               |                                                                                                                                                                    | Title                                                    | Date                                                        |
| Peter Van Woerden                                                                                                                                                                                                                                                                                                                                      |                                                                                                                                                                    | Dir. Finance Publishing Operations                       | 09/25/2015 00:00:00 AM                                      |
| I certify that all information furnished on this form is true and complete. I understand that anyone who furnishes false or misleading information on this form or who omits material or information requested on the form may be subject to criminal sanctions (including fines and imprisonment) and/or civil sanctions (including civil penalties). |                                                                                                                                                                    |                                                          |                                                             |

PS Form 3526, September 2007 (Page 2)

PRIVACY NOTICE: See our privacy policy on www.usps.com

# Understanding Mental Disorders

## Your Guide to DSM-5®

American Psychiatric Association

A consumer guide for anyone who has been touched by mental illness!

With Foreword by Patrick J. Kennedy

Most of us know someone who suffers from a mental illness. This book helps those who may be struggling with mental health problems, as well as those who want to help others achieve mental health and well-being.

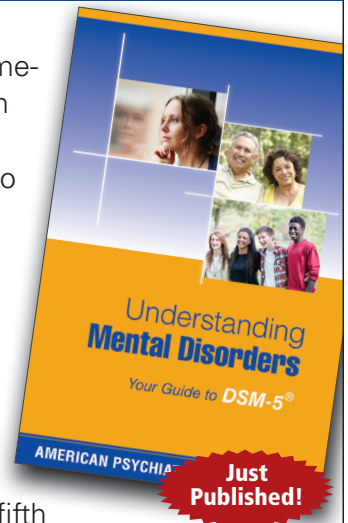

Based on the latest, fifth edition of the *Diagnostic and Statistical Manual of Mental Disorders*—known as DSM-5®—**Understanding Mental Disorders** provides valuable insight on what to expect from an illness and its treatment—and will help readers recognize symptoms, know when to seek help, and get the right care. Featured disorders include depression, schizophrenia, ADHD, autism spectrum disorder, posttraumatic stress disorder, and bipolar disorder, among others.

2015 • 388 pages • ISBN 978-1-58562-491-1  
Paperback • \$24.95 • Item #62491

AMERICAN  
PSYCHIATRIC  
ASSOCIATION  
PUBLISHING

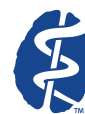

www.appi.org

Phone: 703-907-7322

Toll Free: 1-800-368-5777

Email: appi@psych.org

20% Discount • American Psychiatric Association Members  
25% Discount • APA Resident-Fellow Members

AH1512\_HJH
